# Supplementary material for: RealNeuralNetworks.jl: An Integrated Julia Package for Skeletonization, Morphological Analysis, and Synaptic Connectivity Analysis of Terabyte-Scale 3D Neural Segmentations
Source: Frontiers journal article supplement (doi:10.3389/fninf.2022.828169), 2022-03-02
Supplement: Data_Sheet_1.pdf [file Data_Sheet_1.pdf]

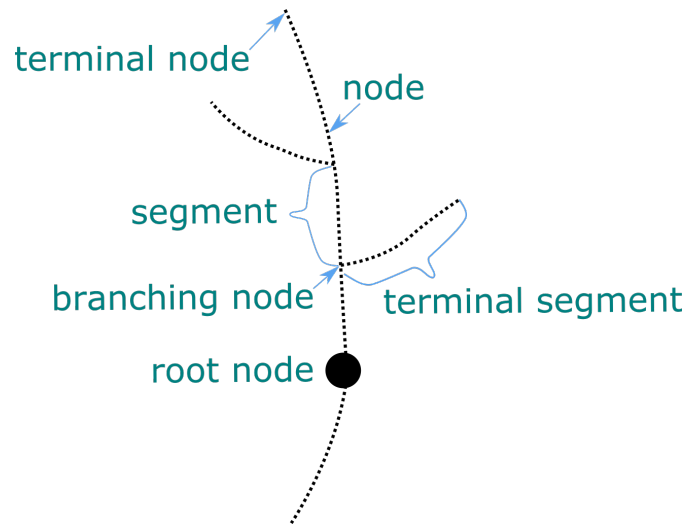

Supplementary Figure 1. Nomenclature of neuron skeleton parts.

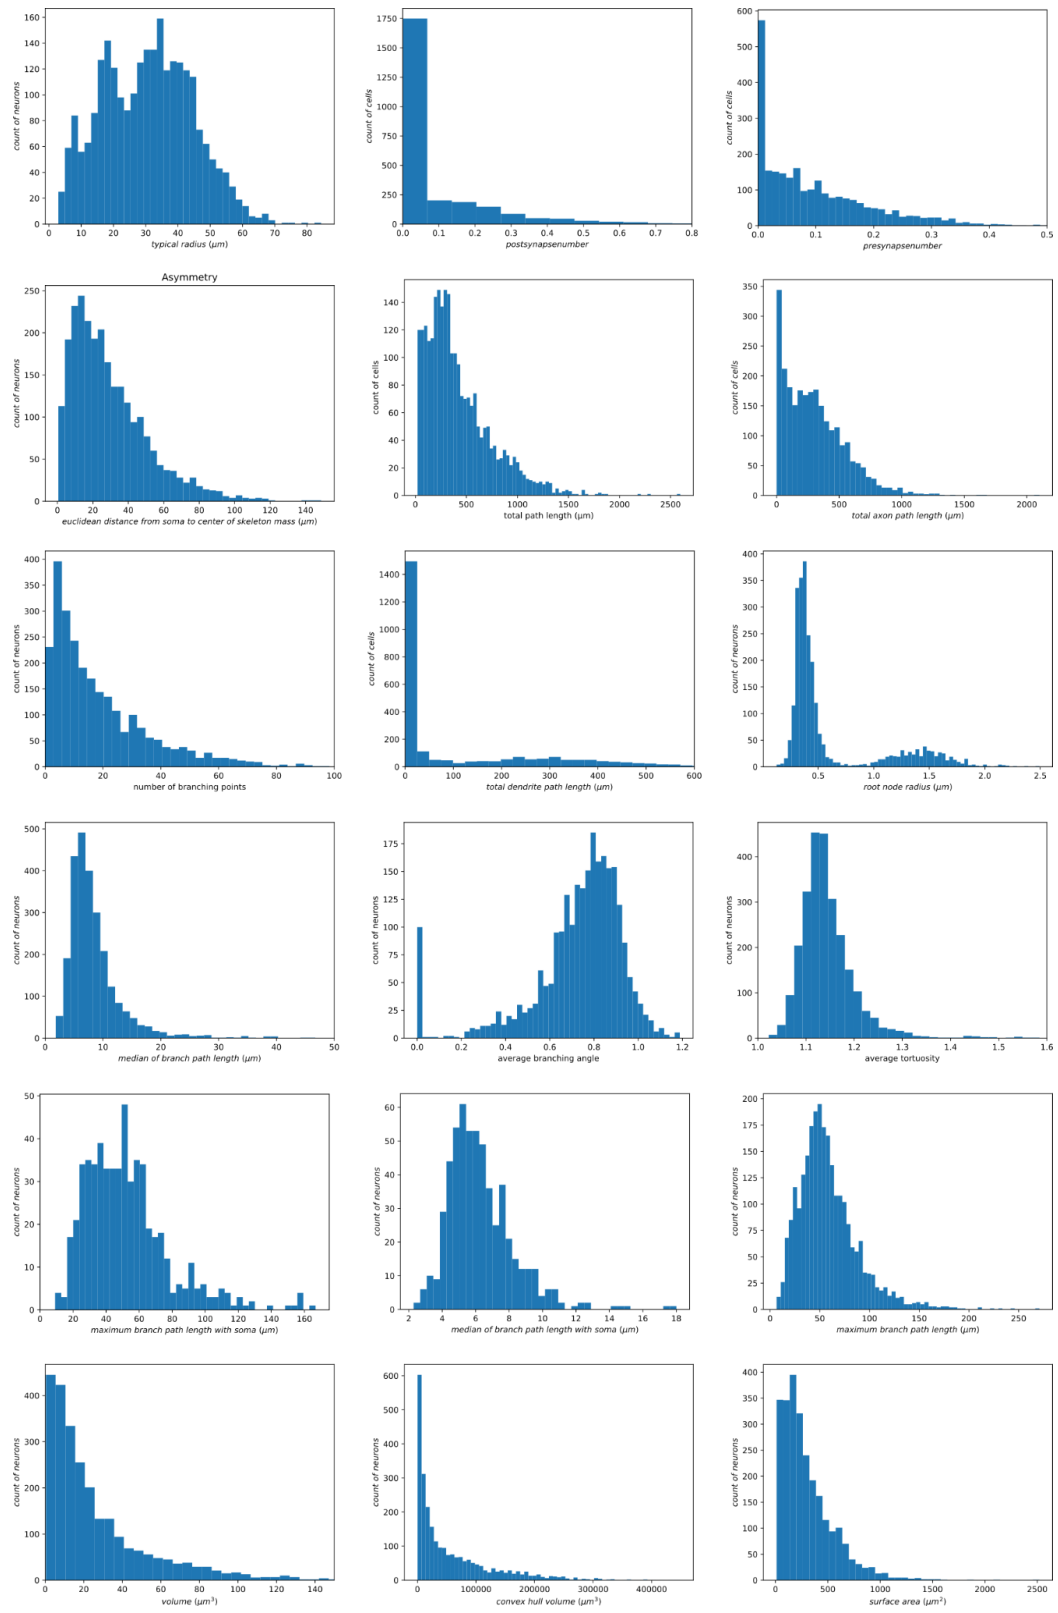

Supplementary Figure 2. Distribution of morphological features.

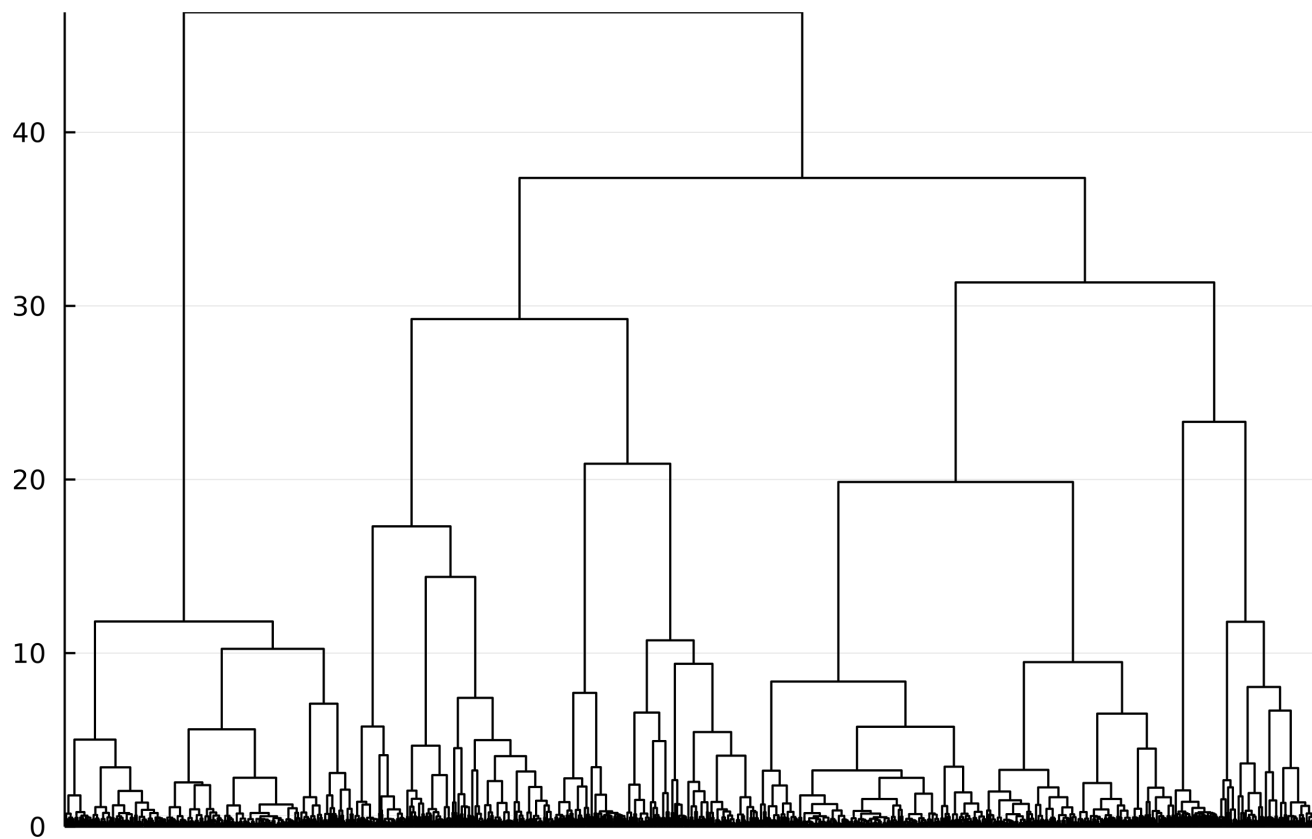

Supplementary Figure 3. Hierarchical clustering using the NBLAST score.
